# Supplementary material for: Glucose Promotes EMMPRIN/CD147 and the Secretion of Pro-Angiogenic Factors in a Co-Culture System of Endothelial Cells and Monocytes
Source: MDPI journal article supplement (doi:10.3390/biomedicines12040706), 2024-03-22
Supplement: s1 [file s1]

Glucose promotes EMMPRIN/CD147 and the secretion of pro-angiogenic factors in a co-culture system of endothelial cells and monocytes

Supplementary Materials

Table S1: detection range, the intra- and inter-assay coefficient of variations (CVs) for the ELISA kits used

| Kit                 | pAMPK      | EMMPRIN    | VEGF       | MMP-9      |
|---------------------|------------|------------|------------|------------|
| Assay range (pg/ml) | 62.5-4,000 | 62.5-4,000 | 31.2-2,000 | 31.2-2,000 |
| Inter-assay CV (%)  | 9.612%     | 11.09%     | 11.33%     | 12.53%     |
| Intra-assay CV (%)  |            | 10.97%     | 9.983%     | 6.764%     |

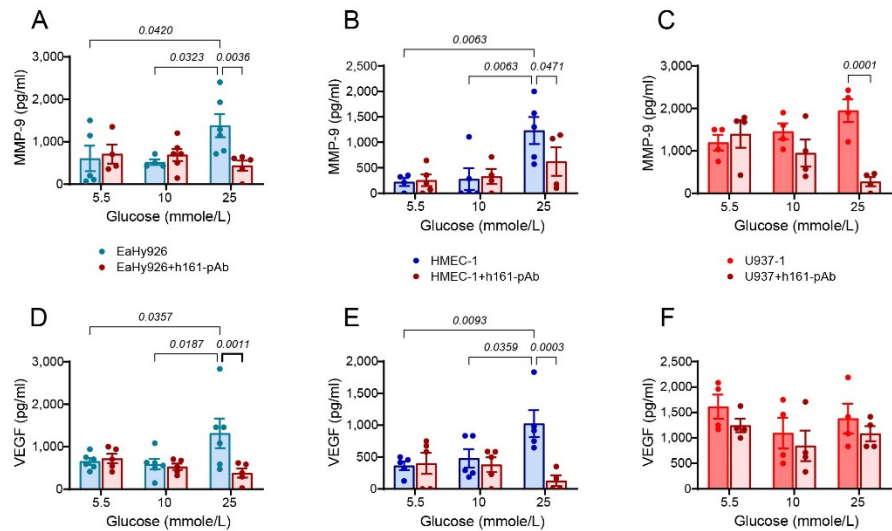

**Figure S1: The anti-EMMPRIN antibody (h161-pAb) reduces the secretion of VEGF and MMP-9 from the three mono-cultured cells.** The human endothelial cells EaHy926, HMEC-1 or the monocytic U937 cell line (20,000 cells/well) were incubated in the indicated glucose concentrations with or without h161-pAb (2 ng/ml) for 48 hours, and the concentrations of (A-C) MMP-9 or (D-F) VEGF were measured in the supernatants. The means  $\pm$  SEM are presented (n=4-5). Data were analyzed using the one-way ANOVA followed by Bonferroni's post-hoc test.

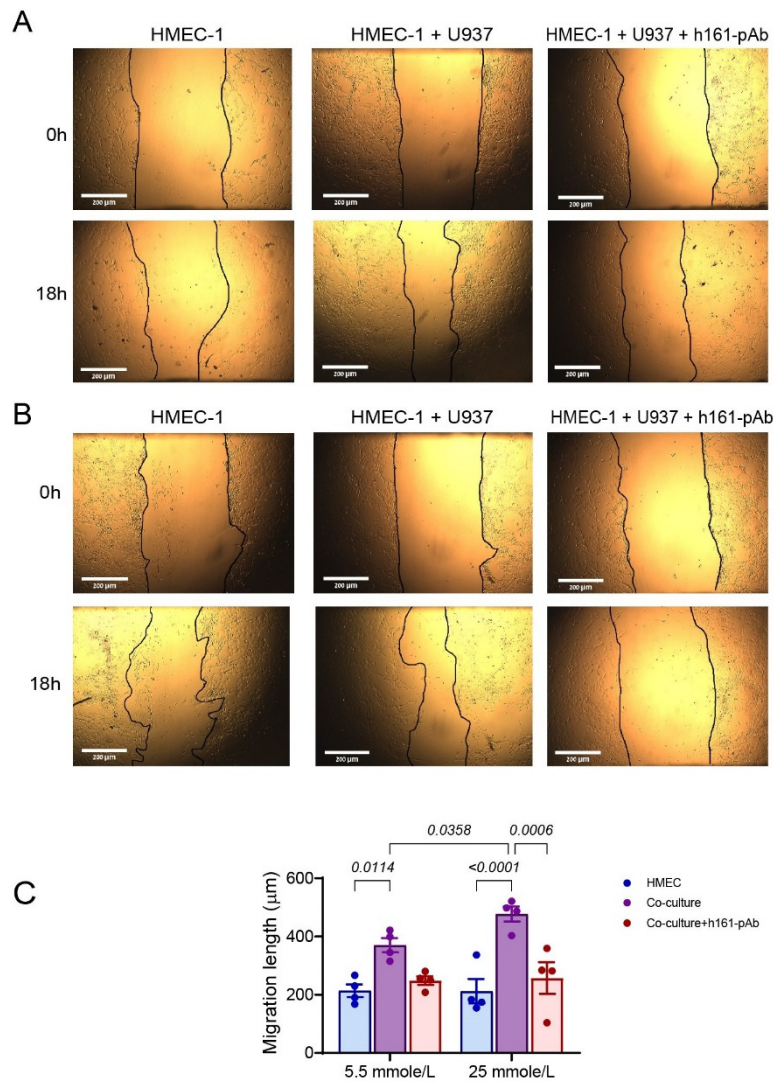

**Figure S2: The anti-EMMPRIN antibody (h161-pAb) decreases HMEC-1 angiogenic potential.** HMEC-1 endothelial cells (20,000/well) were seeded and allowed to grow to confluency overnight. Then, a scratch was made with a toothpick, and non-adherent cells were washed away. The cells were then incubated for additional 18h in full medium and with supernatants (diluted 2.5:1) derived from HMEC-1 cells that were previously incubated alone or in co-culture with glucose and with or without the h161-pAb (2 ng/ml). Representative images at (A) a concentration of 5.5 mmole/L glucose or (B) 25 mmole/L glucose, and (C) quantitative analysis of the assays (n=4-5). The migration distance was calculated as before. The means  $\pm$  SEM are presented, and data were analyzed using the one-way ANOVA followed by Bonferroni's post-hoc test.
